# Supplementary material
Source: PubMed Central journal article supplement (PMC3092187)

### **Supplementary Figure Legend**

BaF3-FLT3-ITD cells were treated with the inhibitors of FLT3 kinase [0.05  $\mu$ M PKC412, 0.1  $\mu$ M AST 487 (AST) and inhibitor III (III)], the inhibitors of the PI3K/AKT pathway [20  $\mu$ M Ly294002 (Ly) and 0.2  $\mu$ M Wortmannin (Wort)], and the inhibitors of GSK-3 $\beta$  (10 mM LiCl, 0.5  $\mu$ M inhibitor VII), or DMSO (Con) for 30 minutes to one hour. The treated cells were harvested and lysed in NP-40 lysis buffer for 30 minutes. Immunoprecipitations were performed using 500  $\mu$ g of total protein from each treatment as starting materials following a protocol suggested by Santo Cruz biotechnology. Briefly, the reaction volumes were equalized to 500  $\mu$ l using NP-40 lysis buffer. The samples were incubated with 1  $\mu$ g of the FLT3 antibody for one hour, followed by addition of 25  $\mu$ l of the protein A/G beads (Santa Cruz Biotechnology). The immunoprecipitation was carried out with rotation at 4°C overnight. After washing, samples were boiled in SDS-PAGE sample buffer and fractionated by electrophoresis in 8 % polyacrylamide gels and subjected to immunoblotting analysis by first probed with anti tyrosine phosphospecific antibody (pTyr, left panel), the membrane was then stripped and reprobed with anti FLT3 antibody (FLT3, right panel).

# Sup Figure

## Ba/F3-FLT3-ITD

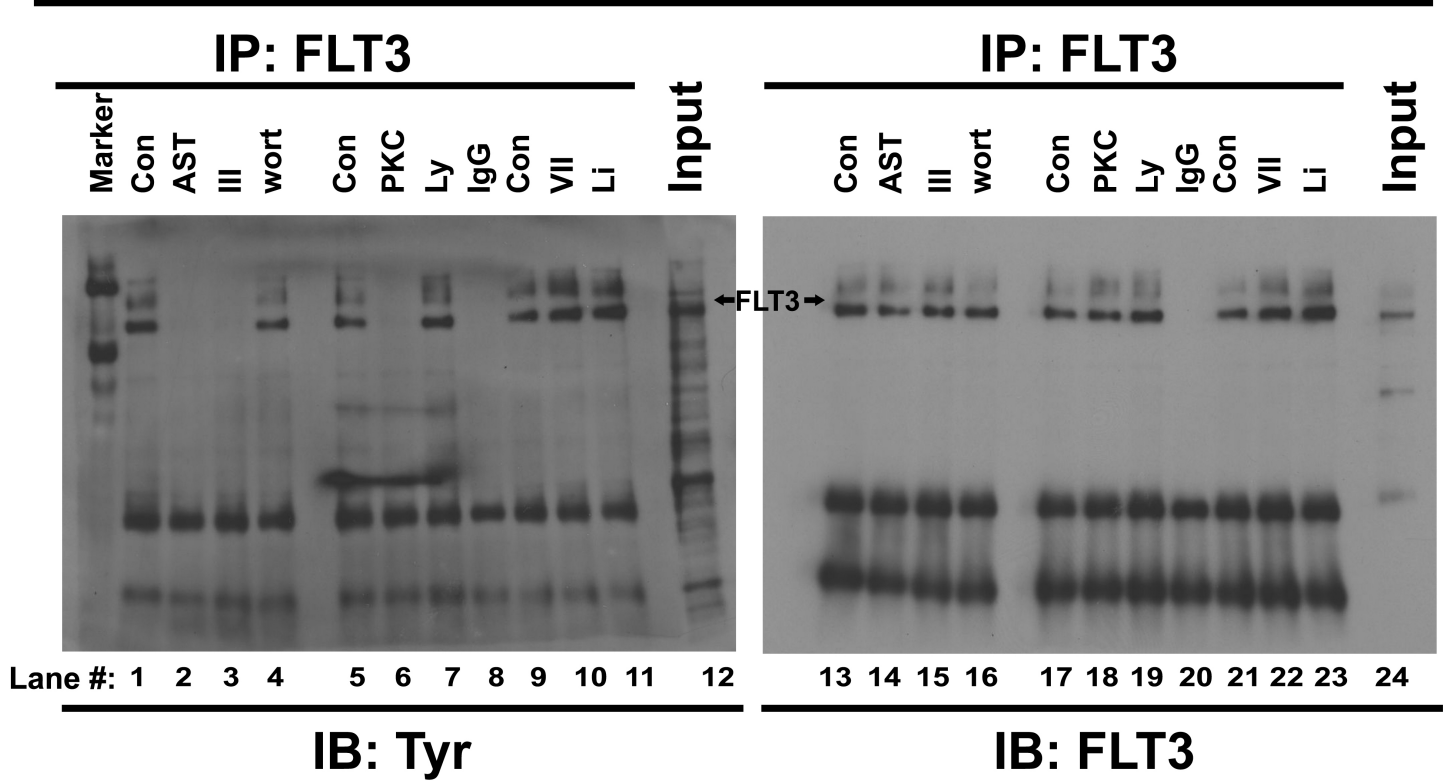

Supplement: supp_1947601910362446_02GANC_Griffin_DS_10.1177_1947601910362446.pdf [file supp_1947601910362446_02GANC_Griffin_DS_10.1177_1947601910362446.pdf]
